# Supplementary material for: The anthropomorphic pursuit of AI-generated journalistic texts: limits to expressing subjectivity
Source: Frontiers journal article supplement (doi:10.3389/fcomm.2024.1456509), 2024-10-15
Supplement: Data_Sheet_1.docx [file Data_Sheet_1.docx]

**Appendix 1: Corpus of 48 Texts**

The corpus of 48 texts used in the article is presented here: Organic text, Synthetic texts, LLM Texts (Created by ChatGPT), Hybrid Texts (AI Edited) and Textoids. The texts are in Spanish because they were originally processed in that language.

**1. Organic Texts**

**Editorial**

1. El País (30 de enero de 2024). Mal clima, mala salud. <https://elpais.com/opinion/2024-01-30/mal-clima-mala-salud.html>
2. El País (04 de febrero de 2024). Por una agricultura sostenible; Conciliar economía y ecología es irrenunciable, pero también lo es que la UE corrija la desigual distribución de las subvenciones. <https://elpais.com/opinion/2024-02-04/por-una-agricultura-sostenible.html>
3. El Mundo (01 de febrero de 2024). La década perdida por el Govern agrava la sequía en Cataluña. <https://www.elmundo.es/opinion/editorial/2024/02/01/65baaad9e4d4d88c108b45c0.html>
4. El Mundo (03 de febrero de 2024). El campo necesita soluciones que no caigan en el chovinismo. <https://www.elmundo.es/opinion/editorial/2024/02/03/65bd456a21efa0e5648b45b1.html>

**Noticias**

1. Marta Glez (10 de febero de 2024). Noche de ‘glamping’ para cuidar el bosque; Visitamos el primer proyecto de turismo regenerativo de la Comunidad de Madrid. El Mundo. <https://www.elmundo.es/economia/actualidad-economica/2023/06/02/646f3e0521efa0f7258b45c3.html>
2. Teresa López Pavón (15 de febrero de 2024). Medio ambiente ¿competirá el h2 con la agricultura por el agua? El Mundo. <https://www.elmundo.es/ciencia-y-salud/medio-ambiente/2024/02/15/65cce445fdddff575f8b457a.html>
3. Pablo Linde (31 de enero de 2024) El Gobierno reactiva la Agencia de Salud Pública. El País. <https://elpais.com/sociedad/2024-01-30/el-gobierno-reactiva-la-creacion-de-la-agencia-estatal-de-salud-publica.html>
4. L. Velasco y C. Garfella (31 de enero de 2024) Cataluña decretará la fase de emergencia por sequía en Barcelona y 201 municipios. El País. <https://elpais.com/espana/catalunya/2024-01-30/cataluna-decretara-este-jueves-la-fase-de-emergencia-por-sequia-en-barcelona-y-200-municipios.html>

**Columnas de opinión**

1. Ignacio de La Torre (21 de marzo de 2021). La decadencia de Europa. El Mundo. https://www.ignaciodelatorre.com/sobre-la-decadencia-de-europa/
2. Jaime Vicioso. (22 de marzo de 2024). Plátano de Canarias o banana: la eterna lucha de David contra Goliat. El Mundo. <https://www.elmundo.es/extras/dia-mundial-del-agua/2024/03/22/65fc3d1821efa0a3618b45cd.html>
3. Wolfgang Münchau (01 de febrero de 2024). Cuando el déficit de atención afecta a la política. El País. <https://elpais.com/opinion/2024-02-01/cuando-el-trastorno-por-deficit-de-atencion-afecta-a-la-politica.html>
4. Leonardo Padura. (17 de marzo de 2024). El mundo tal y como lo conocemos. El País. <https://elpais.com/opinion/2024-03-17/el-mundo-tal-y-como-lo-conocemos.html>

**2. Synthetic Texts**

**Noticias de resultados electorales: Elecciones generales 2023** [**www.rtveia.es**](http://www.rtveia.es) **24/07/2023**

1. RTVE-1 (24/07/2023) El PP gana en Adanero. <https://www.rtveia.es/elecciones-generales-2023/adanero-05001.html>
2. RTVE-2 (24/07/2023) EH Bildu logra el mayor apoyo en Abáigar. <https://www.rtveia.es/elecciones-generales-2023/abaigar-31001.html>
3. RTVE-3 (24/07/2023) El PP gana en Abiego. <https://www.rtveia.es/elecciones-generales-2023/abiego-22001.html>
4. (RTVE-4, 24/07/2023) ERC logra el mayor apoyo en Aguilar de Segarra. <https://www.rtveia.es/elecciones-generales-2023/aguilar-de-segarra-08002.html>
5. (RTVE-5, 24/07/2023). El PP logra el mayor apoyo en Alameda del Valle. <https://www.rtveia.es/elecciones-generales-2023/alameda-del-valle-28003.html>
6. (RTVE-6, 24/07/2023) El PP logra el mayor apoyo en Ábalos. <https://www.rtveia.es/elecciones-generales-2023/abalos-26001.html>
7. (RTVE-7, 24/07/2023) El PSOE logra el mayor apoyo en Acedera. <https://www.rtveia.es/elecciones-generales-2023/acedera-06001.html>
8. (RTVE-8, 24/07/2023) El PP gana las elecciones en Alatoz. <https://www.rtveia.es/elecciones-generales-2023/alatoz-02002.html>
9. (RTVE-9, 24/07/2023) El PP gana las elecciones en Agres. <https://www.rtveia.es/elecciones-generales-2023/agres-03003.html>
10. (RTVE-10, 24/07/2023) El PSOE logra el mayor apoyo en Albánchez. <https://www.rtveia.es/elecciones-generales-2023/albanchez-04004.html>

**Noticias deportivas: El español, Deportes360**

**Deporte360-1**

**Valencia - Mallorca, La Liga en directo: resultado y goles del partido en vivo**

DEPORTE360

354 words

30 March 2024

18:11

El Español.com

ESPACOM

Spanish

© 2024 El León de El Español Publicaciones S.A.

El Valencia CF recibe al RCD Mallorca en el partido de la jornada 30 de La Liga. El encuentro, disputado este sábado 30 de marzo 2024 a las 18:30.

El Valencia recibe este domingo al Mallorca con el objetivo claro de sumar de tres en tres para aferrarse a unas opciones europeas que dependen, en gran medida y curiosamente, de lo que el equipo de Javier Aguirre haga la próxima semana en La Cartuja, donde tiene una cita con la historia al disputar la final de la Copa del Rey ante el Athletic Club.

El equipo bermellón llegará a Mestalla buscando su segunda victoria liguera como visitante, pero también con un ojo puesto en lo que el próximo 6 pase en el estadio sevillano, una situación de la que se quiere aprovechar el conjunto de Rubén Baraja, que espera que las posibles rotaciones de Aguirre y el hecho de estar pensando más en la Copa que en la Liga beneficie a los suyos.

También estará pendiente el equipo valenciano de esa final de Copa en la que el Mallorca anhela su segundo título en la competición del KO, puesto que la victoria de los bilbaínos daría más opciones europeas a un Valencia que está octavo a dos puntos del séptimo, una plaza que ahora mismo no otorga acceso a Europa pero podría hacerlo si los de Ernesto Valverde alzan la Copa más de cuarenta años después.

- Alineaciones:

Valencia: Mamardashvili; Thierry, Mosquera, Cenk, Foulquier; Guillamón, Pepelu, Fran Pérez, Peter; Yaremchuk y Hugo Duro.

Mallorca: Greif; Nacho Vidal, Gio González, Nastasic, Copete, Jaume Costa; Mascarell, Morlanes, Darder; Larin y Muriqi.

Árbitro: Ortiz Arias.

Sede: Estadio de Mestalla

- Horario y dónde verlo por televisión:

El encuentro entre Valencia y Mallorca, correspondiente a la jornada 30 de La Liga podrá seguirse por televisión en Dazn y Gol Play. Está previsto que dé comienzo a las 18:30 de hoy sábado 30 de marzo de 2024. Además, se puede seguir en directo el minuto a minuto gracias a la cobertura de EL ESPAÑOL.

**Deporte360-2**

**Almería 0-3 Osasuna, La Liga: resultado y goles del partido en vivo**

DEPORTE360

80 words

30 March 2024

15:29

El Español.com

ESPACOM

Spanish

© 2024 El León de El Español Publicaciones S.A.

Los rojillos se llevaron los tres puntos gracias a los goles de Arnaiz, Budimir e Iker Muñoz.

El Atlético Osasuna firmó este sábado una goleada en su visita al Almería (0-3) con un tanto de José Arnáiz antes de que se cumpliera el segundo minuto de juego, otro del croata Ante Budimir en el 9 y un tercero de Iker Muñoz en el 61.

**Deporte360-3**

**Getafe 0-1 Sevilla, La Liga en directo: resultado y goles del partido en vivo**

DEPORTE360

135 words

30 March 2024

14:14

El Español.com

ESPACOM

Spanish

© 2024 El León de El Español Publicaciones S.A.

Un solitario tanto de Sergio Ramos, en su 38 cumpleaños, dio una sufrida victoria al conjunto hispalense en el Coliseum.

Tres puntos para el Sevilla en su visita al Getafe en el Coliseum. Los de Quique Sánchez Flores se llevaron una importante victoria contra el conjunto azulón gracias a un solitario tanto de Sergio Ramos, gran protagonista del día. El central camero metió gol en el día de su 38 cumpleaños.

A Ramos le anularon otro gol y el Getafe estuvo cerca de lograr el empate en los minutos finales del partido. Jaime Mata marcó en el 90', pero estaba en fuera de juego, y Latasa antes rozó el gol nada más entrar al campo desde el banquillo.

**Deporte360-4**

**Celta - Rayo, La Liga en directo: resultado y goles del partido en vivo**

DEPORTE360

257 words

31 March 2024

13:32

El Español.com

ESPACOM

Spanish

© 2024 El León de El Español Publicaciones S.A.

El RC Celta de Vigo recibe al Rayo Vallecano en el partido de la jornada 30 de La Liga. El encuentro, disputado este domingo 31 de marzo 2024 a las 14:00.

Presionados por la victoria del Cádiz ante el Granada, Celta de Vigo y Rayo Vallecano buscan un triunfo vital en su carrera hacia la permanencia en Balaídos, escenario del duelo entre los dos entrenadores más jóvenes de LaLiga.

Claudio Giráldez e Íñigo Pérez apenas tienen 36 años. Ambos han llegado a Primera como una solución de urgencia.

El gallego, avalado por su buen trabajo en el filial, al que condujo a la promoción de ascenso a Segunda la pasada temporada y al que este curso mantenía en la pelea por el liderato en el momento de la destitución de Rafa Benítez.

- Alineaciones:

Celta: Guaita, Mingueza, Starfelt, Carlos Domínguez; Hugo Álvarez, Fran Beltrán, Hugo Sotelo, Manu Sánchez, Iago Aspas, Larsen y Bamba.

Rayo: Dimitievski, Balliu, Mumin, Pathé Ciss, Pep Chavarría; Unai López, Óscar Valentín, De Frutos, Isi, Álvaro, Camello.

Árbitro: Hernández Hernández.

Sede: Estadio Abanca Balaídos.

- Horario y dónde verlo por televisión:

El encuentro entre Celta de Vigo y Rayo Vallecano, correspondiente a la jornada 30 de La Liga podrá seguirse por televisión en Movistar LaLiga TV. Está previsto que dé comienzo a las 14:00 de hoy domingo 31 de marzo de 2024. Además, se puede seguir en directo el minuto a minuto gracias a la cobertura de EL ESPAÑOL.

**Deporte360-5**

**Alavés - Real Sociedad, La Liga en directo: resultado y goles del partido en vivo**

DEPORTE360

183 words

31 March 2024

18:20

El Español.com

ESPACOM

Spanish

© 2024 El León de El Español Publicaciones S.A.

El Deportivo Alavés recibe a la Real Sociedad en el partido de la jornada 30 de La Liga. El encuentro, disputado este domingo 31 de marzo 2024 a las 18:30.

La Real Sociedad y el Deportivo Alavés disputarán un derbi vasco en Mendizorroza con la intención de dar un paso importante hacia la salvación para los vitorianos y a competiciones europeas para los donostiarras.

- Alineaciones:

Alavés: Sivera, Gorosabel, Abqar, Rafa Marín, Javi López, Antonio Blanco, Guevera, Guridi, Carlos Vicente, Rioja y Samu

Real Sociedad: Remiro, Traoré, Pacheco, Zubeldia, Galán, Zubimendi, Merino, Barrenetxea, Zakharyan, Kubo y Oyarzabal.

Árbitro: Hernández Maeso

Sede: Estadio de Mendizorroza

- Horario y dónde verlo por televisión:

El encuentro entre Alavés y Real Sociedad, correspondiente a la jornada 30 de La Liga podrá seguirse por televisión en Movistar LaLiga TV. Está previsto que dé comienzo a las 18:30 de hoy domingo 31 de marzo de 2024. Además, se puede seguir en directo el minuto a minuto gracias a la cobertura de EL ESPAÑOL.

**Deporte360-6**

**At. Madrid - Girona, La Liga en directo: resultado y goles del partido en vivo**

DEPORTE360

354 words

13 April 2024

13:47

El Español.com

ESPACOM

Spanish

© 2024 El León de El Español Publicaciones S.A.

El Atlético de Madrid recibe al Girona FC de Vigo en el partido de la jornada 31 de La Liga. El encuentro, disputado este sábado 13 de abril 2024 a las 14:00.

A falta de 24 puntos por disputarse, la ventaja de siete del Girona en la tercera posición dispara la presión sobre el Atlético de Madrid, cuarto, en el duelo de este sábado en el Cívitas Metropolitano, indudablemente decisivo por el podio y crucial por la Liga de Campeones, mientras aparece ya Dortmund visible en el horizonte del equipo madrileño.

La eliminatoria contra el conjunto alemán por una plaza en las semifinales de la 'Champions', inalcanzables desde 2017, condiciona indudablemente el partido de este sábado. Sobre todo, por el desgaste de la ida en casa del pasado miércoles, pero también por lo que se avecina con la vuelta fuera el próximo martes en el intimidante Signal Iduna Park con un 2-1 a favor, pero sin pausa, sin apenas descanso, a todo o nada, sin excusas.

El desgaste es inevitable. Físico y mental. Las rotaciones también. Sólo cinco jugadores, previsiblemente, repetirán de inicio del miércoles a este sábado. Son el portero Jan Oblak, el lateral derecho Nahuel Molina, los centrocampistas Rodrigo de Paul y Koke Resurrección y el delantero Antoine Griezmann, según las pruebas.

- Alineaciones:

Atleti: Jan Oblak; Nahuel Molina, Stefan Savic, Mario Hermoso y Reinildo Mandava; Rodrigo Riquelme, Rodrigo de Paul, Koke Resurrección y Saúl Ñíguez; y Antoine Griezmann y Ángel Correa.

Girona: Paulo Gazzaniga; Èric García, David López, Daley Blind, Miguel Gutiérrez; Aleix García, Yangel Herrera, Solís; Yan Couto, Artem Dovbyk y Sávio.

Árbitro: Ricardo De Burgos Bengoetxea

Sede: Estadio Civitas Metropolitano

- Horario y dónde verlo por televisión:

El encuentro entre Atlético de Madrid y Girona, correspondiente a la jornada 31 de La Liga podrá seguirse por televisión en Dazn. Está previsto que dé comienzo a las 14:00 de hoy sábado 13 de abril de 2024. Además, se puede seguir en directo el minuto a minuto gracias a la cobertura de EL ESPAÑOL.

**Deporte360-7**

**Rayo 0-0 Getafe, La Liga: resultado y goles del partido en vivo**

DEPORTE360

122 words

13 April 2024

15:57

El Español.com

ESPACOM

Spanish

© 2024 El León de El Español Publicaciones S.A.

El derbi madrileño finalizó con un reparto de puntos que no deja contento a nadie. Los de Bordalás se alejan de Europa y los vallecanos siguen muy cerca de los puestos de descenso.

Rayo y Getafe empataron en Vallecas (0-0) un derbi madrileño que dominó en posesión y ocasiones el equipo vallecano, que fue incapaz de perforar la portería del conjunto de José Bordalás, muy seguro en línea defensiva.

Con el empate, el Getafe sigue entre los diez primeros con 39 puntos mientras que el Rayo se queda con 31, a seis del descenso, a la espera de lo que haga el Cádiz frente al Barcelona.

**Deporte360-8**

Las Palmas - Sevilla, La Liga en directo: resultado y goles del partido en vivo

DEPORTE360

87 words

14 April 2024

13:28

El Español.com

ESPACOM

Spanish

© 2024 El León de El Español Publicaciones S.A.

La UD Las Palmas recibe al Sevilla FC en el partido de la jornada 31 de La Liga.

Las Palmas y Sevilla disputarán este domingo un clásico de Primera División que regresa seis años después al Estadio de Gran Canaria en la peor racha de los amarillos desde que comenzó la temporada, ante un conjunto hispalense que necesita seguir sumando puntos para evitar complicaciones en la zona baja de la tabla.

**Deporte360-9**

**Athletic - Villarreal, La Liga en directo: resultado y goles del partido en vivo**

DEPORTE360

317 words

14 April 2024

18:06

El Español.com

ESPACOM

Spanish

© 2024 El León de El Español Publicaciones S.A.

El Athletic Club de Bilbao recibe al Villarreal CF en el partido de la jornada 31 de La Liga. El encuentro, disputado este domingo 14 de abril 2024 a las 18:30.

Athletic Club y Villarreal miden en San Mamés el alcance de la resaca de la semana de festejos del equipo bilbaíno, que se proclamó campeón de Copa el pasado fin de semana en Sevilla y no ha parado desde entonces, y la ilusión del conjunto amarillo por alcanzar la zona europea.

La victoria del Athletic en la final de Copa sobre el Mallorca fue buena para los dos equipos. Para el rojiblanco porque el trofeo, además del valor en sí mismo, lleva consigo la clasificación para la Liga Europa; y para el amarillo, que hará a su rival pasillo de honor, porque el triunfo bilbaíno abre una plaza más de competiciones continentales.

Lo alargados de los festejos por el título copero, que arrancaron en la madrugada del sábado al domingo y no finalizaron hasta avanzada la noche del jueves, apuntan a un Athletic desgastado y poco centrado en un choque en el que, no obstante, se juega opciones de alcanzar la Liga de Campeones.

- Alineaciones:

Athletic: Unai Simón; De Marcos, Vivian, Paredes, Yuri; Vesga, Prados; Iñaki Williams, Sancet, Nico Williams y Guruzeta.

Villarreal: Jorgensen; Femenía, Mosquera, Albiol, Alberto Moreno; Comesaña, Parejo, Baena; Traoré, Gerard y Sorloth.

Árbitro: Guillermo Cuadra Fernández

Sede: Estadio San Mamés.

- Horario y dónde verlo por televisión:

El encuentro entre Athletic y Villarreal, correspondiente a la jornada 31 de La Liga podrá seguirse por televisión en Movistar Plus+ y Movistar LaLiga TV. Está previsto que dé comienzo a las 18:30 de hoy domingo 14 de abril de 2024. Además, se puede seguir en directo el minuto a minuto gracias a la cobertura de EL ESPAÑOL.

**Deporte360-10**

**Bayern - Arsenal, Champions en directo: resultado y goles del partido en vivo**

DEPORTE360

282 words

17 April 2024

20:04

El Español.com

ESPACOM

Spanish

© 2024 El León de El Español Publicaciones S.A.

El Bayern Munich recibe al Arsenal en el partido de vuelta de cuartos de final de la UEFA Champions League. El encuentro, disputado este miércoles 17 de abril 2024 a las 21:00.

El Bayern de Múnich tiene este miércoles la oportunidad de optar a un título esta temporada tras la consecución de la Bundesliga por parte del Bayer Leverkusen ante un Arsenal que quiere seguir vivo en la Liga de Campeones para seguir soñando con conseguir la primera 'orejona'.

El Bayern llega al partido de vuelta contra el Arsenal justo después de que se haya hecho oficial el fin de una serie de once títulos de la Bundesliga con el triunfo del Bayer Leverkusen que deja al equipo bávaro con la Liga de Campeones como último camino para tratar de salvar la temporada.

Los dirigidos por Thomas Tuchel llegan con tres bajas importantes. Alphonso Davies no estará por acumulación de amarillas; mientras que Serge Gnabry y Kingsley Coman siguen lesionados.

- Alineaciones:

Bayern: Neuer, Kimmich, Dier, De Ligt, Mazraoui, Laimer, Goretzka, Sané, Musiala, Guerreiro y Kane.

Arsenal: Raya, White, Gabriel, Saliba, Tomiyasu, Odegaard, Jorginho, Rice, Saka, Martinelli y Havertz.

Árbitro: Danny Makkelie (Países Bajos).

Sede: Allianz Arena (Munich).

- Horario y dónde verlo por televisión:

El encuentro entre Bayern y Arsenal, correspondiente a la vuelta de los cuartos de final de la UEFA Champions League podrá seguirse por televisión en Movistar+ Liga de Campeones. Está previsto que dé comienzo a las 21:00 de hoy miércoles 17 de abril de 2024. Además, se puede seguir en directo el minuto a minuto gracias a la cobertura de EL ESPAÑOL.

**3. LLM Texts (Created by ChatGPT)**

1. The Guardian (08/09/2022). A robot wrote this entire article. Are you scared yet, human GPT-3 <https://www.theguardian.com/commentisfree/2020/sep/08/robot-wrote-this-article-gpt-3>
2. Diario Financiero (24/12/2022). La nota periodística que Chat GPT escribió para DF MAS. [https://dfmas.df.cl/df-mas/glocal/una-conversacion-con-chat-gpt-el-robot-de-inteligencia-artificial-al:~:text=%E2%80%9CHola!,texto%20humano%20de%20alta%20calidad](https://dfmas.df.cl/df-mas/glocal/una-conversacion-con-chat-gpt-el-robot-de-inteligencia-artificial-al#:~:text=%E2%80%9CHola!,texto%20humano%20de%20alta%20calidad).
3. Infocielo (29/12/2022). Este artículo está completamente escrito por Inteligencia Artificial _ Infocielo <https://infocielo.com/sociedad/este-articulo-esta-completamente-escrito-inteligencia-artificial-n753507>
4. Genbeta (17/01/2023). Le pedí a la IA de ChatGPT hacer mi trabajo. Aquí está el resultado. <https://www.genbeta.com/a-fondo/le-pedi-a-ia-chatgpt-hacer-mi-trabajo-aqui-esta-resultado>
5. Infolibre (23/12/2022). Cómo ChatGPT cambiará para siempre el periodismo. <https://www.infolibre.es/opinion/columnas/telefono-rojo/chatgpt-cambiara-periodismo_129_1393346.html>

**4. Hybrid Texts (AI Edited)**

1. IA Editado-1 Brankate (11/06/2023). Best places to live in Colorado in 2023. <https://www.bankrate.com/real-estate/best-places-to-live/colorado/>
2. IA Editado-2. BuzzFeed (16/03/2023). Montreal: A City Full Of Life And Flavor. <https://www.buzzfeed.com/astoldtobuzzy/montreal-ai-cowritten>
3. IA Editado-3. BuzzFeed ( 14/03/2023). West Virginia: A Cheap, Friendly, and Spooky Adventure You Never Knew You Needed. <https://www.buzzfeed.com/astoldtobuzzy/west-virginia-ai-cowritten>
4. IA Editado-4 (17/03) BuzzFeed. Cape May, NJ: Where The Beach, Bungalows, And Bliss Converge. <https://www.buzzfeed.com/astoldtobuzzy/cape-may-nj-ai-cowritten>
5. IA Editado-5. BuzzFeed (17/03/2023) Stockholm: It Will Ruin You For Other Cities. <https://www.buzzfeed.com/astoldtobuzzy/stockholm-it-will-ruin-you-for-other-cities>
6. **Textoids**

**Prompts**

The prompts used in the research in Spanish and their translation into English are presented below.

**Prompt 1:** Simula el rol de un periodista de investigación y redacta un artículo noticioso, en ocho párrafos, para un diario español de circulación nacional sobre la deforestación a nivel mundial, sus causas y sus efectos en el cambio climático.

**Prompt 2:** Simula el rol de un periodista de investigación y redacta un artículo noticioso, en ocho párrafos, para un diario español de circulación nacional sobre la deforestación a nivel mundial, sus causas y sus efectos en el cambio climático. La redacción debe reflejar el carácter subjetivo de la escritura humana.

**Prompt 3:** Simula el rol de un periodista de investigación y redacta un artículo noticioso, en ocho párrafos, para un diario español de circulación nacional sobre la deforestación a nivel mundial, sus causas y sus efectos en el cambio climático. Para optimizar la expresión de la subjetividad en el texto, considera los criterios que te presento a continuación.

**Translated prompts:**

**Prompt 1:** Simulate the role of an investigative journalist and write a news article, in eight paragraphs, for a national Spanish newspaper about global deforestation, its causes, and its effects on climate change.

**Prompt 2:** Simulate the role of an investigative journalist and write a news article, in eight paragraphs, for a national Spanish newspaper about global deforestation, its causes, and its effects on climate change. The writing should reflect the subjective nature of human expression.

**Prompt 3:** Simulate the role of an investigative journalist and write a news article, in eight paragraphs, for a national Spanish newspaper about global deforestation, its causes, and its effects on climate change. To optimize the expression of subjectivity in the text, consider the criteria presented below.

**ChatGPT 3.5, Prompt 1**

**La deforestación global: un desafío urgente para el clima y la biodiversidad**

En los últimos años, la deforestación se ha convertido en un tema crucial en la agenda mundial, planteando serios desafíos para el clima y la biodiversidad. Según datos de la Organización de las Naciones Unidas para la Alimentación y la Agricultura (FAO), cada año se pierden alrededor de 10 millones de hectáreas de bosques en todo el mundo, lo que equivale a la desaparición de una superficie del tamaño de Grecia. Este fenómeno alarmante tiene raíces profundas y múltiples causas, que van desde la expansión agrícola hasta la tala ilegal y la urbanización descontrolada.

Uno de los principales motores detrás de la deforestación es la expansión de la agricultura y la ganadería, especialmente en regiones tropicales como la Amazonia y el sudeste asiático. Grandes extensiones de bosques se talan para dar paso a plantaciones de cultivos comerciales, como la soja y el aceite de palma, así como para la cría de ganado. Esta actividad, aunque genera beneficios económicos a corto plazo, tiene consecuencias devastadoras para el medio ambiente, ya que los bosques actúan como sumideros de carbono y albergan una inmensa biodiversidad.

La deforestación no solo contribuye al cambio climático al liberar grandes cantidades de dióxido de carbono a la atmósfera, sino que también reduce la capacidad de los bosques para absorber este gas de efecto invernadero. Además, la pérdida de hábitats forestales amenaza la supervivencia de innumerables especies de flora y fauna, muchas de las cuales podrían extinguirse antes si no se toman medidas urgentes.

Las comunidades indígenas y locales que dependen de los bosques para su subsistencia también se ven gravemente afectadas por la deforestación, ya que pierden sus medios de vida tradicionales y se enfrentan a la degradación ambiental. Esta situación genera conflictos sociales y violaciones de los derechos humanos, exacerbando aún más la crisis.

Para abordar este desafío global, es fundamental adoptar medidas coordinadas a nivel internacional que promuevan la conservación de los bosques y fomenten prácticas sostenibles de uso de la tierra. Esto incluye el fortalecimiento de la legislación ambiental, la aplicación rigurosa de las leyes existentes y la implementación de incentivos económicos para la conservación forestal.

En conclusión, la deforestación representa una amenaza inminente para el clima, la biodiversidad y el bienestar humano en todo el mundo. Urge tomar acciones decisivas para detener y revertir este proceso destructivo, antes de que sea demasiado tarde. La protección de los bosques no es solo una cuestión ambiental, sino también una cuestión de justicia social y supervivencia planetaria.

**Gémini, Prompt 1**

**La deforestación: Un enemigo silencioso que amenaza al planeta**

Los bosques, considerados los pulmones del planeta, se encuentran bajo una grave amenaza: la deforestación. Este proceso, que implica la tala y eliminación de árboles a gran escala, está teniendo un impacto devastador en el medio ambiente y contribuyendo al cambio climático.

Las causas de la deforestación son variadas, pero las principales están relacionadas con la actividad humana. La expansión de la agricultura, la ganadería y la explotación forestal son algunos de los factores que más contribuyen a la pérdida de bosques. A esto se suman otros motivos como la construcción de infraestructuras, la minería y la extracción de recursos naturales.

Las consecuencias de la deforestación son alarmantes. La pérdida de bosques no solo afecta a la biodiversidad y al equilibrio ecológico, sino que también tiene un impacto directo en el cambio climático. Los árboles absorben dióxido de carbono (CO2), uno de los principales gases de efecto invernadero, y lo almacenan en su biomasa. Cuando se talan, este CO2 se libera a la atmósfera, intensificando el calentamiento global.

Se estima que la deforestación es responsable de aproximadamente el 10% de las emisiones mundiales de CO2. Esto la convierte en uno de los principales contribuyentes al cambio climático, junto con la quema de combustibles fósiles.

Además de su impacto en el clima, la deforestación también tiene otras consecuencias negativas. Entre ellas se encuentran la erosión del suelo, la pérdida de biodiversidad, la desertificación y la escasez de agua.

Ante esta situación crítica, es necesario tomar medidas urgentes para frenar la deforestación y proteger los bosques. Algunas de las soluciones que se plantean son:

Promover la reforestación y la gestión sostenible de los bosques.

Reducir el consumo de productos que provienen de la deforestación, como la carne de vacuno, el aceite de palma y la madera.

Apoyar a las comunidades locales que dependen de los bosques para su supervivencia.

Fortalecer las leyes y políticas que protegen los bosques.

La lucha contra la deforestación es un desafío global que requiere la acción conjunta de gobiernos, empresas y ciudadanos. Solo si actuamos ahora podremos proteger los bosques y evitar las graves consecuencias que su pérdida podría tener para el planeta.

**ChatGPT 3.5, Prompt 2**

**La devastación silenciosa: La deforestación y su peligroso legado en el cambio climático**

En un mundo cada vez más preocupado por el cambio climático, un tema continúa pasando desapercibido ante los ojos del público: la deforestación. Detrás de la majestuosidad de los bosques tropicales y la aparente tranquilidad de los árboles se esconde una crisis silenciosa que está dejando una huella imborrable en nuestro planeta.

Las causas de esta devastación son múltiples y complejas. Desde la explotación desmedida de recursos naturales hasta la expansión descontrolada de la agricultura y la ganadería, el hombre ha desencadenado un proceso destructivo que amenaza con alterar irreversiblemente el equilibrio de nuestro ecosistema. La codicia y el afán de lucro han llevado a la tala indiscriminada de millones de árboles, sin considerar las consecuencias a largo plazo.

Pero los efectos de esta voraz actividad no se limitan al ámbito local. La deforestación tiene un impacto directo en el cambio climático, contribuyendo significativamente a la emisión de gases de efecto invernadero y al aumento de la temperatura global. La pérdida de los bosques tropicales, considerados los pulmones del planeta, reduce su capacidad para absorber el dióxido de carbono, exacerbando así el calentamiento global.

Además, la deforestación provoca la pérdida de biodiversidad, poniendo en peligro la supervivencia de innumerables especies vegetales y animales. Los ecosistemas se ven alterados, los hábitats se destruyen y la cadena alimentaria se desequilibra, creando un efecto dominó que repercute en todas las formas de vida del planeta.

A pesar de la gravedad de la situación, la deforestación continúa avanzando a un ritmo alarmante. Las medidas para detener este proceso son insuficientes y muchas veces llegan tarde. Se requiere una acción global urgente y coordinada, que involucre a gobiernos, empresas y ciudadanos, para revertir esta tendencia y proteger nuestros bosques antes de que sea demasiado tarde.

En última instancia, la lucha contra la deforestación no es solo una cuestión ambiental, sino también moral y ética. Nos enfrentamos a la responsabilidad de preservar el legado natural que hemos heredado, no solo para las generaciones futuras, sino también para el bienestar de nuestro propio presente. La deforestación no es solo un problema lejano y abstracto; es una amenaza tangible que requiere de nuestra atención y acción inmediatas.

**Gemini, Prompt 2**

## La deforestación: Un pulmón verde bajo la sombra del hacha

El mundo se ahoga en una paradoja: mientras la humanidad lucha por respirar un aire cada vez más viciado, nos empeñamos en destruir los pulmones verdes del planeta. La deforestación, esa lacra silenciosa que avanza sin piedad, se ha convertido en una de las mayores amenazas para la supervivencia de nuestra especie.

Los números hablan por sí solos: cada año, desaparecen bajo el filo de las motosierras millones de hectáreas de bosques, un ritmo aterrador que nos acerca a un punto de no retorno. La Amazonia, ese vergel de biodiversidad que nos regala el oxígeno que respiramos, se ve especialmente afectada por esta plaga.

Las causas de esta masacre ambiental son complejas y variadas. La expansión de la frontera agrícola, la tala indiscriminada para la industria maderera, la minería ilegal y la construcción de infraestructuras se erigen como los principales culpables. Pero detrás de estas actividades se esconde una realidad aún más cruda: la codicia desmedida del ser humano.

Las consecuencias de la deforestación son devastadoras. La pérdida de estos ecosistemas vitales altera el equilibrio del planeta, intensifica el cambio climático, pone en peligro la biodiversidad y amenaza la seguridad alimentaria de millones de personas.

El cambio climático es, sin duda, la más acuciante de las consecuencias. Los bosques actúan como sumideros de carbono, absorbiendo el dióxido de carbono de la atmósfera y liberando oxígeno. La destrucción de estos bosques libera ese CO2 a la atmósfera, acelerando el calentamiento global y sus nefastas repercusiones.

La pérdida de biodiversidad es otra grave consecuencia. Los bosques albergan una gran parte de las especies del planeta, muchas de ellas aún desconocidas para la ciencia. La deforestación fragmenta su hábitat y las empuja a la extinción, rompiendo el delicado equilibrio de los ecosistemas.

La seguridad alimentaria también se ve amenazada. Los bosques son esenciales para la agricultura, ya que regulan el clima, protegen los suelos y proporcionan agua para riego. Su destrucción pone en riesgo la producción de alimentos, especialmente en las zonas más vulnerables del planeta.

Es hora de despertar de esta pesadilla autoinfligida. La deforestación no es solo un problema ambiental, es una crisis que nos involucra a todos. Gobiernos, empresas y ciudadanos debemos unir fuerzas para detener este ecocidio y proteger los bosques, esos guardianes silenciosos de la vida en la Tierra.

El futuro del planeta está en juego. No podemos permitir que la codicia y la indiferencia destruyan nuestro hogar. Es momento de actuar, de exigir un cambio radical en nuestras políticas y de adoptar un estilo de vida más responsable con el medio ambiente. Solo así podremos asegurar un futuro verde para las próximas generaciones.

**ChatGPT 3.5, Promp 3**

**El Silencio de los Bosques: Una Crónica de la Deforestación Global**

En el vasto telar del mundo, donde la naturaleza teje la vida misma, se está desvaneciendo un hilo crucial: los bosques. La deforestación, esa implacable hoz que desgarra el verde manto de la Tierra, no solo deja cicatrices visibles en la piel del planeta, sino que también socava los cimientos mismos de nuestro futuro. Desde los exuberantes trópicos hasta los fríos confines boreales, ningún rincón escapa a su voracidad insaciable. Pero, ¿cuáles son las causas detrás de esta tragedia ambiental y cuáles son sus insidiosos efectos en el cambio climático?

Las Voces del Bosque Claman en el Viento

En esta sinfonía de destrucción, las voces del bosque claman en el viento, susurran historias milenarias de vida entrelazada. "La deforestación es como una herida abierta en el alma del mundo", expresa el renombrado biólogo forestal, Dr. Alejandro Morales, cuyos ojos reflejan la tristeza de ver desaparecer los bosques que ha estudiado toda su vida. Esta polifonía de testimonios nos recuerda que la pérdida de los bosques no es solo un asunto de carbono y biodiversidad, sino también de identidad y espiritualidad.

El Eco del Hacha en el Corazón de la Selva

Detrás del eco del hacha en el corazón de la selva se esconde una red de intereses voraces: la expansión agrícola, la ganadería intensiva, la extracción desmedida de recursos. "La deforestación es un síntoma de un sistema económico depredador que valora más el lucro inmediato que la supervivencia a largo plazo", denuncia la activista ambiental Sofía García, cuyas palabras resuenan como un eco de indignación en los salones del poder.

Los Bosques, Guardianes del Clima

Los bosques, guardianes ancestrales del clima, están perdiendo su batalla contra el calentamiento global. "Cada árbol talado libera una nube de carbono que había sido pacientemente almacenada durante décadas", advierte el climatólogo Martín López, cuyos estudios revelan la estrecha relación entre la deforestación y el aumento de las temperaturas globales. En este combate desigual, la Tierra pierde no solo su verdor, sino también su principal escudo contra el cambio climático.

El Grito de la Tierra: ¡Basta Ya!

Ante esta emergencia silenciosa, el grito de la Tierra resuena con una urgencia ineludible: ¡Basta ya! Es hora de cambiar el curso de nuestra historia, de replantear nuestro vínculo con la naturaleza y de abrazar un modelo de desarrollo que respete los límites del planeta. "La deforestación es un síntoma de una enfermedad más profunda: la desconexión entre la humanidad y la naturaleza", reflexiona la filósofa ambiental María Ruiz, cuyas palabras nos invitan a reconectar con nuestra esencia primigenia.

En el Corazón del Bosque, Renace la Esperanza

Pero en el corazón del bosque, donde la luz se filtra entre las hojas danzantes, renace la esperanza. Cada árbol plantado, cada hectárea protegida, es un acto de resistencia contra la voracidad del progreso desmedido. "La deforestación puede revertirse si actuamos con determinación y solidaridad", afirma el líder indígena Manuel Pérez, cuyas manos trabajadoras son semillas de cambio en la tierra fértil de la conciencia colectiva.

Un Llamado a la Acción Global

El reloj de la naturaleza avanza inexorablemente, pero aún estamos a tiempo de cambiar el rumbo de nuestra historia. Este no es solo un llamado a la acción, sino también a la introspección, a cuestionar nuestros valores y prioridades como sociedad. "La deforestación es un espejo que refleja nuestra relación con el mundo que habitamos", concluye la poetisa Laura Gómez, cuyas palabras nos invitan a mirarnos en ese espejo y a encontrar en él la inspiración para construir un futuro más verde y justo para todos.

**Gemini Promp 3**

**La deforestación: Una herida en el alma de la Tierra**

El mundo se ahoga en una paradoja: mientras la humanidad lucha por respirar un aire cada vez más viciado, nos empeñamos en destruir los pulmones verdes del planeta. La deforestación, esa lacra silenciosa que avanza sin piedad, se ha convertido en una de las mayores amenazas para la supervivencia de nuestra especie.

**Un pulmón verde bajo la sombra del hacha**

Los números hablan por sí solos: cada año, desaparecen bajo el filo de las motosierras millones de hectáreas de bosques, un ritmo aterrador que nos acerca a un punto de no retorno. La Amazonia, ese vergel de biodiversidad que nos regala el oxígeno que respiramos, se ve especialmente afectada por esta plaga.

**Las raíces del mal: Codicia y negligencia**

Las causas de esta masacre ambiental son complejas y variadas. La expansión de la frontera agrícola, la tala indiscriminada para la industria maderera, la minería ilegal y la construcción de infraestructuras se erigen como los principales culpables. Pero detrás de estas actividades se esconde una realidad aún más cruda: la codicia desmedida del ser humano.

**Las cicatrices de un planeta enfermo**

Las consecuencias de la deforestación son devastadoras. La pérdida de estos ecosistemas vitales altera el equilibrio del planeta, intensifica el cambio climático, pone en peligro la biodiversidad y amenaza la seguridad alimentaria de millones de personas.

**El cambio climático: Un enemigo invisible**

El cambio climático es, sin duda, la más acuciante de las consecuencias. Los bosques actúan como sumideros de carbono, absorbiendo el dióxido de carbono de la atmósfera y liberando oxígeno. La destrucción de estos bosques libera ese CO2 a la atmósfera, acelerando el calentamiento global y sus nefastas repercusiones.

**Un canto fúnebre por la biodiversidad**

La pérdida de biodiversidad es otra grave consecuencia. Los bosques albergan una gran parte de las especies del planeta, muchas de ellas aún desconocidas para la ciencia. La deforestación fragmenta su hábitat y las empuja a la extinción, rompiendo el delicado equilibrio de los ecosistemas.

**Un futuro incierto para el plato de cada día**

La seguridad alimentaria también se ve amenazada. Los bosques son esenciales para la agricultura, ya que regulan el clima, protegen los suelos y proporcionan agua para riego. Su destrucción pone en riesgo la producción de alimentos, especialmente en las zonas más vulnerables del planeta.

**Un llamado a la acción: Un futuro verde es posible**

Es hora de despertar de esta pesadilla autoinfligida. La deforestación no es solo un problema ambiental, es una crisis que nos involucra a todos. Gobiernos, empresas y ciudadanos debemos unir fuerzas para detener este ecocidio y proteger los bosques, esos guardianes silenciosos de la vida en la Tierra.

**Un canto a la esperanza: Juntos podemos sanar el planeta**

El futuro del planeta está en juego. No podemos permitir que la codicia y la indiferencia destruyan nuestro hogar. Es momento de actuar, de exigir un cambio radical en nuestras políticas y de adoptar un estilo de vida más responsable con el medio ambiente. Solo así podremos asegurar un futuro verde para las próximas generaciones.

**Un mensaje final: Unámonos por un planeta vivo**

En este viaje hacia la sanación del planeta, cada uno de nosotros tiene un papel que jugar. Desde exigir a nuestros líderes que tomen medidas contundentes hasta cambiar nuestros hábitos de consumo, cada acción, por pequeña que parezca, suma. Juntos, podemos tejer una red de esperanza que proteja los bosques y garantice un futuro sostenible para todos.

**Un llamado a la reflexión: ¿Qué legado queremos dejar?**

Mientras contemplamos la desolación que deja a su paso la deforestación, una pregunta resuena en nuestros corazones: ¿Qué legado queremos dejar a las generaciones venideras? ¿Un planeta devastado por la codicia y la negligencia? ¿O un mundo verde y próspero, donde la armonía entre el ser humano y la naturaleza sea la norma? La respuesta está en nuestras manos. Elegamos sabiamente.
